# Supplementary material
Source: PubMed Central journal article supplement (PMC10112901)
Supplement: develop-150-201309-s1.pdf [file develop-150-201309-s1.pdf]

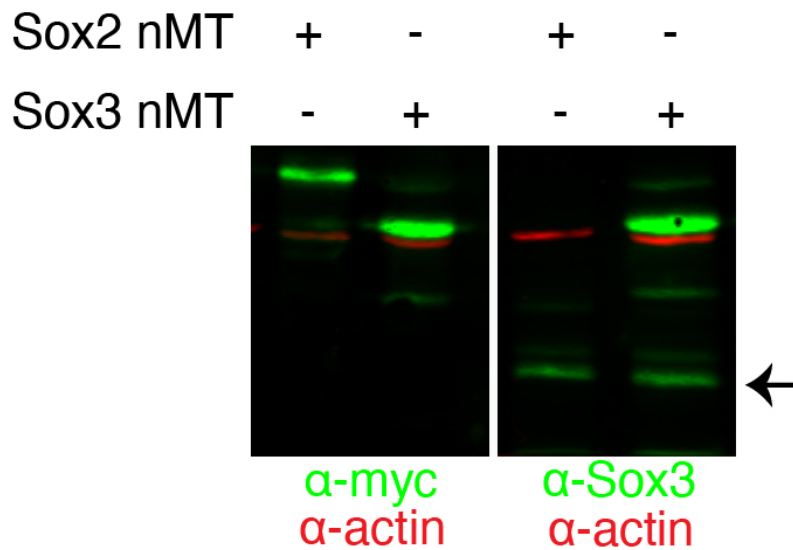

**Fig. S1.** Western blot of embryos at blastula stage expressing myc-tag Xenopus Sox2 or Sox3. Left blot is using the myc 9E10 monoclonal antibody (Green) and anti actin for loading control (Red). The right blot is performed using the anti Sox3 antibody (DA5H6sox3, Green). Note that the upper band corresponding to Sox2 is not recognized by mAb DA5H6sox3.

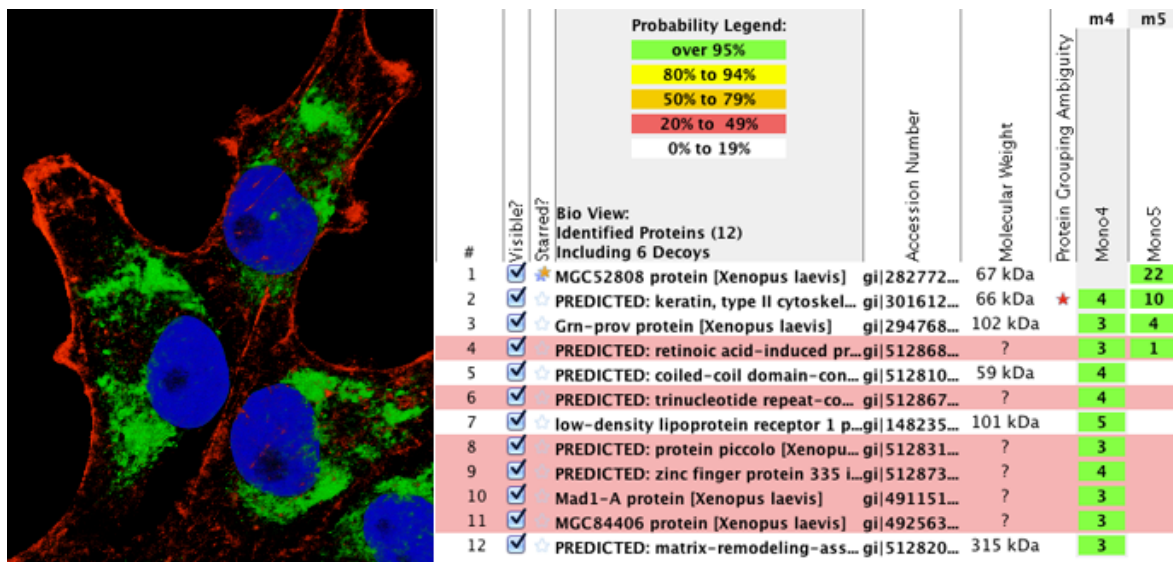

**Fig. S2.** Characterization of the Rpn1 antibody (Mono5, m5) by Immunofluorescence (Left, green) and Immunoprecipitation followed by Mass spectrometry (Right). The nuclei are labelled with (DAPI) and the actin cytoskeleton is in red (Phalloidin). The main protein pulled down by m5 not pulled down by another mAb (m4) is MGC52808 (ribophorin 1/Rpn1), an ER resident protein.
